# Supplementary material for: Effects of planned place of birth on obstetric interventions and foeto-maternal birth outcomes in low-risk women in European countries: A systematic review and meta-analysis
Source: Research Square preprint supplement (doi:10.21203/rs.3.rs-4139779/v1), 2024-05-15
Supplement: Supplementary file 1 [file 3d1a1d2e820a0d2d31be375e.docx]

**Table 1**: **Characteristics of the included studies**

| **Author(s), year, country** | **Study design** | **Data source and period** | **Data analysis by parity** | **Place of birth** | | **Outcome(s) reported** | **NOS score**  **(4-2-3)** |
| --- | --- | --- | --- | --- | --- | --- | --- |
| Planned homebirth **n/N (%)** | Planned Institutional birth **n/N (%)** |
| Isaline et al., 2019, Belgium (34) | Retrospective cohort | MLOZ (Mutualit ØLibres Onafhankelijke Ziekenfondsen) was the third Belgian statutory healthcare insurer from 1 March 2014 until 31 October 2015 | not stratified | 59/89 (66.3) | 30/89 (33.7) | 2-5, 20 | 3-2-3 |
| A de Jonge, 2013, Netherlands (22) | Retrospective cohort | "LEMMoN” data from 1 August 2004 to 1 August 2006, combined with data from the Netherlands perinatal registry | Adjusted and stratified | 92,333/146,752 (62.9) | 54,419/146,752 (37.1) | 8 | 3-1-2 |
| A deJonge et al, 2014, Netherlands (23) | Retrospective cohort | National perinatal and neonatal registration data over seven years from 2000 to 2006 | Adjusted and stratified | 321,307/529,688 (60.7) | 63,261/529,688 (30.8) | 12, 15, 16 | 4-2-2 |
| Wiegerinck et al, 2018, Netherlands (24) | Retrospective cohort | National Perinatal Register (PRN) and extra medical information obtained from hospitals and midwifery units in Amsterdam between January 1, 2005, and December 31, 2007. | not stratified | 46,764/57,396 (81.5) | 10,632/57,396 (18.5) | 2,4, 5, 8, 12, 19 | 3-2-3 |
| Palau-Costafreda et al, 2023, Spain (35) | Retrospective cohort | Medical history, obstetric characteristics, and maternal  and neonatal outcomes were recorded by obstetric health-  care professionals in patient charts and the hospital's  information system in MLU and OU between January 2018 and December 2020 | NP (not performed) | 255/878(29.0) | 623/878(71.0) | 2-5, 8-11, 16, 19 | 3-1-3 |
| Blix et al, 2012, Norway (36) | Retrospective cohort | Midwives' registers, telephone interviews, and birth protocols were used for homebirth data, and the Medical Birth Registry of Norway (MBRN) was used for institutional data from 1990 to 2007. | Adjusted and stratified | 1631/17,941(9.1) | 16,310/17,941(90.9) | 2-5, 8, 9, 12, 15, 16, 17, 19 | 2-1-3 |
| Bolten et al, 2016, Netherlands (25) | Prospective cohort | DELIVER Study participants from 20 midwifery practices between January 2018 and December 2020. | Adjusted and stratified | 2050/3495 (58.7) | 1445/3495 (41.3) | 1, 3-5, 8, 9, 12-18 | 4-2-2 |
| Dobbie G et al, 1993, UK (30) | Randomised controlled trial | Leicester Royal Infirmary Maternity Hospital and home-like-home delivery scheme from 1 March 1989 until 6 July 1990. | not stratified | 2304/3510 (65.6) | 1206/3510 (34.4) | 1-5, 8, 10, 12, 13 | Rob 2 (see Additional file 2) |
| Wami et al, 2022, Hungary (7) | Retrospective cohort | Home: Hungarian Tauffer database (perinatal registry)  Institutional: University Hospital Gyn/Oby Clinic from 2012-2020 | not stratified | 1792/2997 (59.8) | 1205/2997 (40.2) | 8-14, 17, 19 | 3-2-2 |
| Campiotti et al, 2020, Italy (37) | Case-control study | All out-of-hospital births reported in birth registry data from 2014 to 2018 were extracted. | not stratified | 848/1099 (77.0) | 251/1099 (23.0) | 1, 4, 9, 13, 15 | 3-2-2 |
| Overgaard et al, 2012, Denmark (31) | Prospective cohort | Data were collected in a sparsely populated region of North Denmark from two FMUs and two OUs over 3.5 years (2004-2008). | NP (not performed) | 839/1678 (50.0) | 839/1678 (50.0) | 1,2, 4,5, 9, 19, 20 | 3-1-2 |
| Kooy et al, 2017, Netherlands (15) | Retrospective cohort | The Perinatal Registry (PRN) in the Netherlands between 2000 and 2007 | not stratified | 402,912/679,952 (59.0) | 219,105/679,952 (32.0) | 2, 4, 5, 6, 12, 13, 15, 16, 18 | 4-1-3 |
| Offerhaus et al, 2020, Netherlands (26) | Retrospective cohort | Data from all women who gave birth in 2015 and were registered in the Dutch Perinatal Registry (Perined). | stratified | 657/2611(25.2) | 1954/2611(74.8) | 3-5, 8, 9, 12-17, 19 | 3-2-2 |
| VanHaaren-tenHaken et al, 2015, Netherlands (27) | Prospective cohort | A Dutch prospective cohort study involved 150 randomly selected practices to enrol women in midwife care, using a questionnaire and medical records from 2007-2011. | stratified | 226/576 (39.2) | 182/576 (31.6) | 1-5, 8-16, 18, 19, 21 | 4-2-2 |
| Wiegerinck et.al, 2015, Netherlands (28) | Retrospective cohort | Data from hospitals and midwife practices in the catchment area of both academic hospitals linked with the perinatal register (PRN) in Amsterdam between 2005 and 2008. | not stratified | 26,128/56,294 (46.4) | 30,166/56,294 (53.6) | 1-5, 8, 9, 11, 12, 19, 20 | 3-2-2 |
| Eide et al, 2009, Norway (38) | Prospective cohort | Data from the hospital and pregnancy records were gathered between November 3, 2001, and May 31, 2002 | NP (not performed) | 252/451 (55.9) | 201/451 (44.6) | 2-5, 9 | 3-1-2 |
| Bernitz et al., 2011, Norway (29) | Randomised controlled trial | Women who delivered at the Østfold Hospital Trust, recorded in the electronic journal system of the department, partus (Clinsoft) from 2006-2009 | not stratified | 282/1,111 (25.4) | 412/1,111(37.1) | 1, 2, 4, 5, 8, 9, 17, 19, 20 | Rob 2 (see Additional file 2) |
| Halfdansdottir et al, 2015, Iceland (32) | Retrospective cohort | An Icelandic electronic birth registry and direct contact with midwives and tertiary/rural secondary hospitals from 2005-2009 | Adjusted and stratified | 307/1,228 (25.0) | 921/1,228 (75.0) | 1-5, 8, 9, 13, 17-21 | 3-1-2 |
| Van der Kooy et al, 2016, UK (33) | Retrospective cohort | Anonymised data of the UK National Perinatal Epidemiology Unit  Report and the midwifery-led birth centre Sophia between January 2007 and June 2012 | Stratified | 443/5,953 (7.4) | 1391/5,953 (23.4) | 4, 5, 8, 9, 12-16, 18-20 | 4-2-2 |
| Bartuseviciene et al, 2018, Lithuania (39) | Retrospective cohort | Hospital registry at the tertiary-care women’s hospital in Kaunas, Lithuania. | stratified | 477/1,283 (37.2) | 806/1,283 (62.8) | 3-5, 9, 10, 19 | 3-2-3 |
| Christensen et al, 2017, Denmark (21) | Retrospective cohort | Data from two freestanding midwifery units and two obstetric units in the North Denmark Region from March 2004 to October 2008. | Adjusted and stratified | 839/1,678 (50.0) | 839/1,678 (50.0) | 1, 2, 4, 5, 9, 19, 20 | 3-1-2 |

Outcome variables: 1) Oxytocin administration/Augmentation, 2) Epidural analgesia, 3) Episiotomy, 4) Assisted vaginal delivery (forceps/vacuum), 5) Caesarean section(C/s), 6) Blood transfusion, 7) Maternal death, 8) Post-partum hemorrhage (PPH), 9) 3rd or 4th-degree perineal tear, 10) Vaginal or perineal laceration, 11) Retained placenta, 12) Perinatal or neonatal or fetal mortality, 13) Low birth weight <2500g or <10%, 14) Large birth weight ≥4000g or >90%, 15) Preterm/premature born, 16) Post-term-born, 17) Non-vertex presentation, 18) Neonatal mal-formations (congenital anomalies), 19) Low Apgar score <7 at one or 5mins, 20) NICU admission, 21) Neonatal ventilation/resuscitation

**Table 2: Summary of the obstetric interventions and maternal outcome meta-analysis findings for all women by level of integration**

| **Outcome (strata)** | **Number of studies** | **Place of birth** | | **OR [95%CI]**  **M-H, Random** | **I2(%)** |
| --- | --- | --- | --- | --- | --- |
| Planned homebirth **n/N (%)** | Planned Institutional birth **n/N (%)** |
| **Obstetric interventions** | | | |  | |
| **Oxytocin administration** | 9 | 740/31908 | 11298/35432 | 0.29 [0.04, 2.39] | 100 |
| Well-Integrated | 5 (19, 22, 23, 25, 27) | 556/30648 | 11158/35014 | 0.25 [0.02, 3.80] | 80 |
| Less-well integrated | 2 (24, 29) | 184/1260 | 140/418 | 0.43 [0.23, 0.81] | 100 |
| **Epidural Analgesics** | 9 | 2343/74753 | 4909/42733 | 0.26 [0.18, 0.37] | 100 |
| Well-Integrated | 5 (18, 22, 23, 25, 27) | 2184/73775 | 4214/41597 | 0.34 [0.24, 0.46] | 93 |
| Less-well integrated | 4 (24, 28–30) | 159/978 | 695/1136 | 0.19 [0.05, 0.73] | 97 |
| **Episiotomy** | 9 | 3695/31164 | 5536/37474 | 1.14 [0.66, 1.96] | 98 |
| Well-Integrated | 4 (21–23, 25) | 3448/30121 | 5120/35812 | 1.69 [0.71, 4.04] | 99 |
| Less-well integrated | 5 (34,35,38,39) | 247/1043 | 416/1662 | 0.74 [0.48, 1.13] | 68 |
| **Assisted vaginal delivery (Vacuum/forceps)** | 14 | 34862/480037 | 24827/266933 | 0.68 [0.55, 0.83] | 94 |
| Well-Integrated | 8 (18, 20–23, 26, 27, 32) | 34734/478036 | 24670/264960 | 0.71 [0.56, 0.90] | 96 |
| Less-well integrated | 6 (24, 28–31, 33) | 128/2001 | 157/1973 | 0.59 [0.41, 0.85] | 27 |
| **Caesarean section (C-section)** | 11 | 12443/478751 | 15899/264590 | 0.40 [0.24, 0.68] | 99 |
| Well-Integrated | 6 (18, 20–23, 27) | 12359/477296 | 15733/262648 | 0.24 [0.12, 0.49] | 99 |
| Less-well integrated | 5 (24, 28–31) | 84/1455 | 166/1942 | 0.69 [0.46, 1.01] | 38 |
| **Maternal outcome** |  |  |  |  |  |
| **Post-partum haemorrhage (PPH)** | 10 | 3905/172115 | 5107/104358 | 0.69 [0.46, 1.03] | 97 |
| Well-Integrated | 7 (16, 18, 21–23, 25, 26) | 3867/169656 | 5068/102248 | 0.63 [0.40, 1.00] | 98 |
| Less-well integrated | 3 (7, 24, 30) | 38/2459 | 39/2110 | 0.92 [0.52, 1.64] | 26 |
| **3rd or 4th-degree perineal tear** | 12 | 2002/78532 | 1099/48133 | 1.04 [0.91, 1.19] | 20 |
| Well-Integrated | 6 (18, 21–23, 26, 27) | 1960/74798 | 1045/44891 | 1.10 [1.01, 1.20] | 0 |
| Less-well integrated | 6 (7, 24, 28, 30, 31, 33) | 42/3734 | 54/3242 | 0.63 [0.41, 0.97] | 0 |
| **Perineal or vaginal laceration** | 5 | 1275/5831 | 991/6192 | 1.22 [0.58, 2.57] | 97 |
| Well-Integrated | 2 (22, 25) | 961/3307 | 441/3649 | 2.27 [1.13, 4.56] | 84 |
| Less-well integrated | 3 (7, 30, 31) | 314/2524 | 550/2543 | 0.84 [0.50, 1.41] | 88 |
| **Retained placenta** | 5 | 939/75136 | 1221/42765 | 0.41 [0.37, 0.45] | 0 |
| Well-Integrated | 3 (18, 22, 23) | 933/73089 | 1205/40937 | 0.41 [0.37, 0.45] | 0 |
| Less-well integrated | 2 (7, 30) | 6/2047 | 16/1828 | 0.49 [0.18, 1.36] | 14 |

I2- Heterogeneity

**Table 3: Summary of fetal-neonatal outcome meta-analysis findings by level of midwifery healthcare integration**

| Foeto-neonatal outcome (strata) | Number of studies | **Place of birth** | | **OR [95%CI]**  **M-H, Random** | **I2** |
| --- | --- | --- | --- | --- | --- |
| Planned homebirth **n/N (%)** | Planned Institutional birth **n/N (%)** |
| **Perinatal or neonatal or foetal mortality** | 10 | 731/806794 | 552/448979 | 1.05 [0.62, 1.79] | 82 |
| Well-Integrated | 8 (17–21, 23, 25, 26) | 716/803371 | 529/431464 | 1.00 [0.54, 1.85] | 0 |
| Less-well integrated | 2 (7, 34) | 15/3423 | 23/17515 | 1.37 [0.61, 3.07] | 85 |
| **Low birth weight <2500g or SGA <10%** | 7 | 28242/407185 | 18570/225009 | 0.84 [0.69, 1.03] | 46 |
| Well-Integrated | 5 (20, 21, 26, 32) | 28105/404545 | 18503/223553 | 0.84 [0.75, 0.93] | 9 |
| Less-well integrated | 2 (7, 33) | 137/2640 | 67/1456 | 0.73 [0.31, 1.70] | 85 |
| **Large birth weight ≥4000g or LGA >90%** | 3 | 844/2675 | 444/3341 | 1.41 [0.83, 2.40] | 79 |
| Well-Integrated | 2 (21, 22) | 46/883 | 94/2136 | 1.04 [0.71, 1.53] | 0 |
| Less-well integrated | 1 (7) | 798/1792 | 350/1205 | 1.96 [1.68, 2.29] | Na |
| **Preterm/premature born** |  |  |  |  |  |
| Well-Integrated | 6 (17, 20–22, 25, 26) | 20236/728655 | 12586/389403 | 0.89 [0.81, 0.98] | 80 |
| Less-well integrated | 0 | - | - | - | - |
| **Post-term born** | 6 | 77296/725800 | 36760/386516 | 1.17 [1.05, 1.30] | 81 |
| Well-Integrated | 5 (17, 20–22, 26) | 77292/725545 | 36758/385893 | 1.16 [1.04, 1.28] | 83 |
| Less-well integrated | 1 (35) | 4/255 | 2/623 | 4.95 [0.90, 27.19] | Na |
| **Non-vertex presentation** | 5 | 67/3394 | 204/4544 | 0.59 [0.41, 0.85] | 33 |
| Well-Integrated | 3 (21, 22, 32) | 46/1190 | 173/3057 | 0.67 [0.48, 0.93] | 0 |
| Less-well integrated | 2 (7, 24) | 21/2204 | 31/1487 | 0.46 [0.16, 1.37] | 71 |
| **Neonatal mal-formations (congenital anomalies)** |  |  |  |  |  |
| Well-Integrated | 4 (20, 22, 26, 32) | 4727/403888 | 2936/221599 | 0.61 [0.34, 1.08] | 62 |
| Less-well integrated | - | - | - | - | - |
| **Apgar score <7 at one or 5mins** | 11 | 559/79806 | 549/49293 | 0.73 [0.55, 0.96] | 44 |
| Well-Integrated | 7 (18, 19, 21–23, 26, 27) | 523/76870 | 519/46377 | 0.66 [0.58, 0.76] | 0 |
| Less-well integrated | 4 (7, 24, 30, 31) | 36/2936 | 30/2916 | 1.47 [0.21, 10.26] | 76 |
| **NICU admission** | 6 | 186/74415 | 263/43117 | 0.60 [0.40, 0.90] | 65 |
| Well-Integrated | 4 (18, 23, 26, 27) | 149/73944 | 241/42805 | 0.47 [0.34, 0.64] | 37 |
| Less-well integrated | 2 (24, 29) | 37/471 | 22/312 | 1.11 [0.64, 1.93] | 0 |

I2- Heterogeneity, Na- not applicable, NICU-Neonatal intensive care unit
