# Supplementary material for: Effects of planned place of birth on obstetric interventions and foeto-maternal birth outcomes in low-risk women in European countries: A systematic review and meta-analysis
Source: Research Square preprint supplement (doi:10.21203/rs.3.rs-4139779/v1), 2024-05-15
Supplement: Supplementary file 2 [file fad078da5b293043cc90f4ab.docx]

**Cochrane risk of bias assessment for randomised trials 2 (RoB 2)**


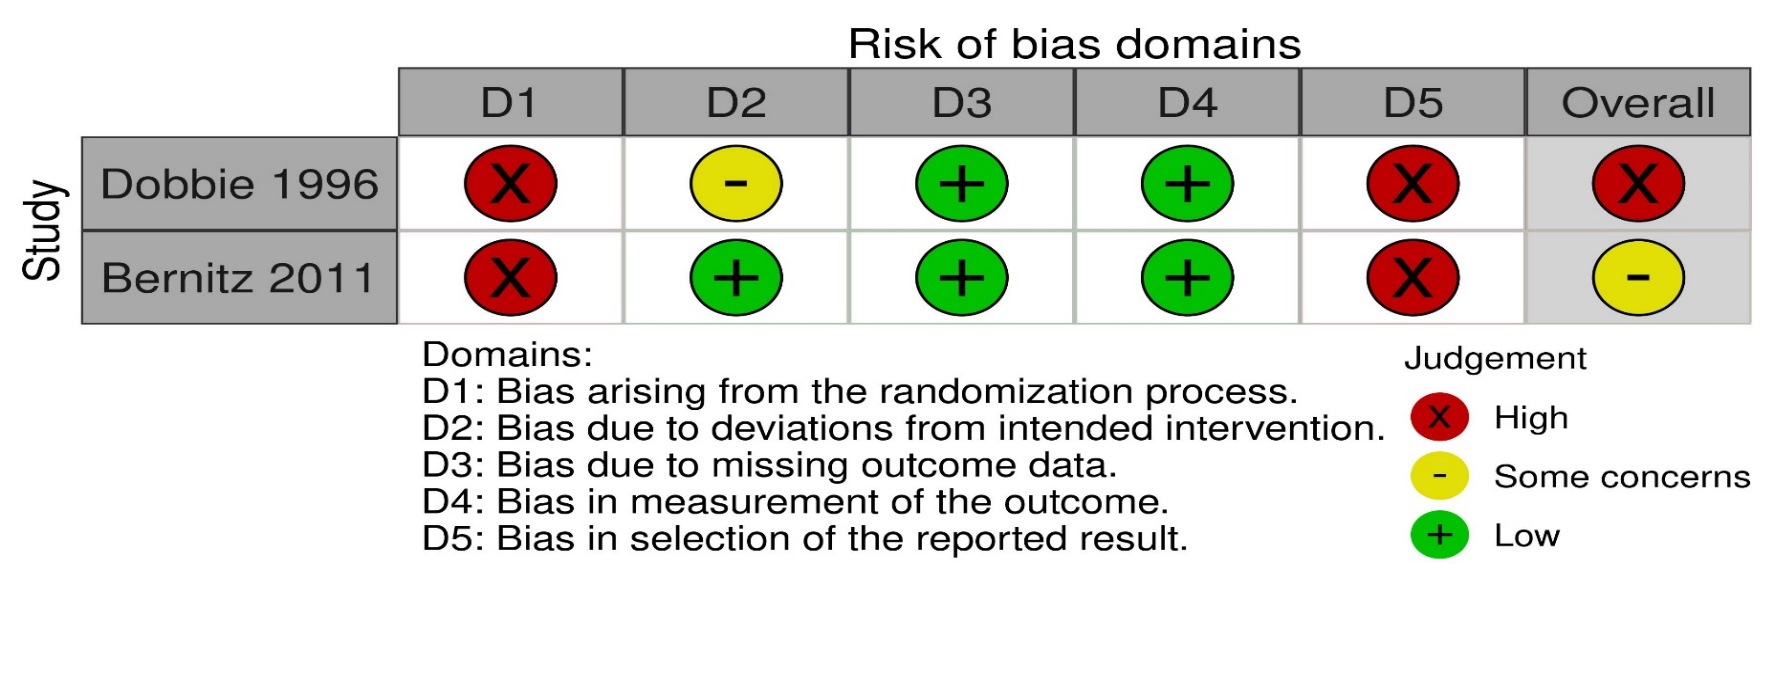


[[1]](#footnote-1)Dobbie G, Owen‐Johnstone L, Jagger C, Hopkins M, Kennedy J. Simulated home delivery in hospital: a randomised controlled trial. BJOG An Int J Obstet Gynaecol. 1993;100(4):316–23.

Bernitz S, Rolland R, Blix E, Jacobsen M, SjØborg K, Øian P. Is the operative delivery rate in low-risk women dependent on the level of birth care? A randomised controlled trial. BJOG An Int J Obstet Gynaecol. 2011;118(11):1357–64

1. 1Randomized control trials [↑](#footnote-ref-1)
