# Supplementary material for: Effects of planned place of birth on obstetric interventions and foeto-maternal birth outcomes in low-risk women in European countries: A systematic review and meta-analysis
Source: Research Square preprint supplement (doi:10.21203/rs.3.rs-4139779/v1), 2024-05-15
Supplement: Supplementary file 3 [file fe6ae3f43e162480086a2048.docx]

| (a)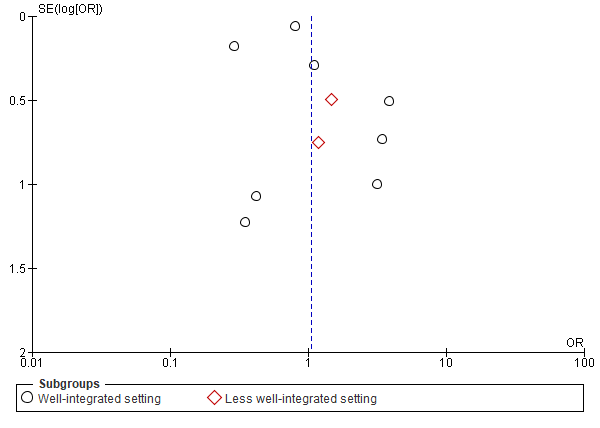  Perinatal mortality | (b)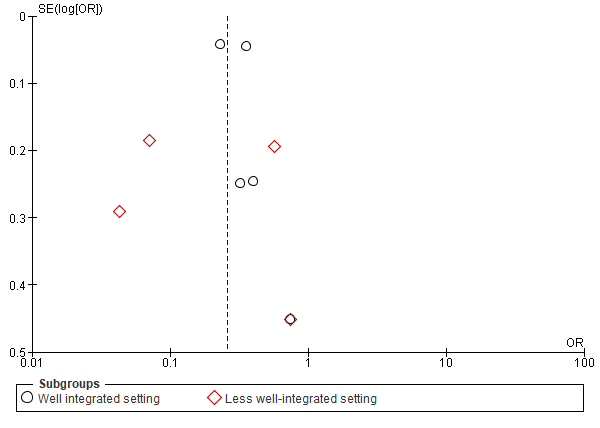  Epidural analgesia |
| --- | --- |
| (c)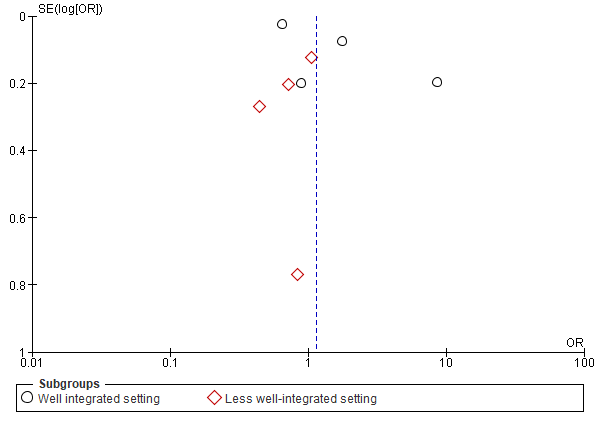  Episiotomy | (d)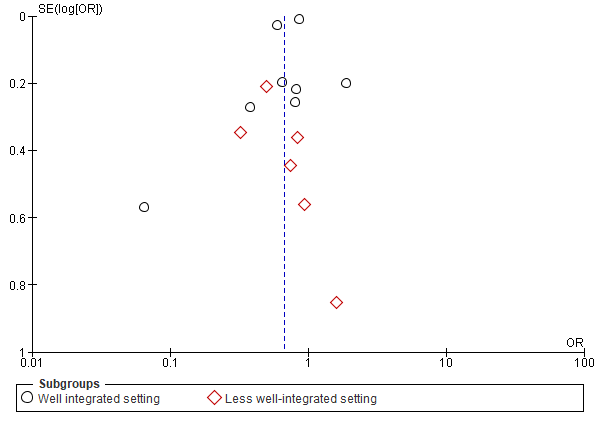  Assisted vaginal births (forceps/vacuum) |
| (e)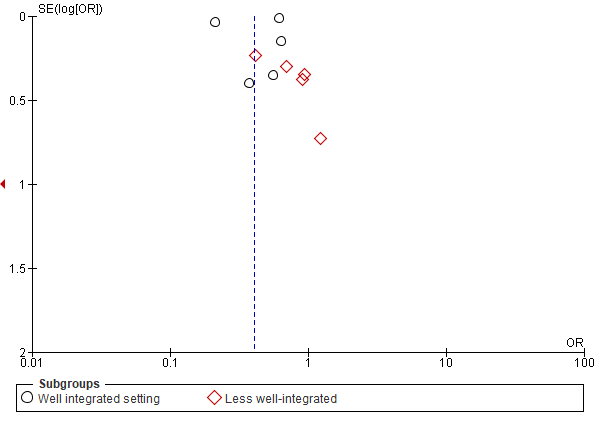  Cesarean section | (f)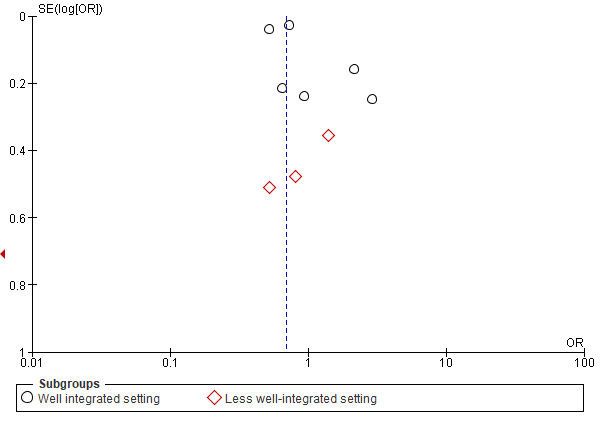  Post partum haemorrhage (PPH) |
| (g)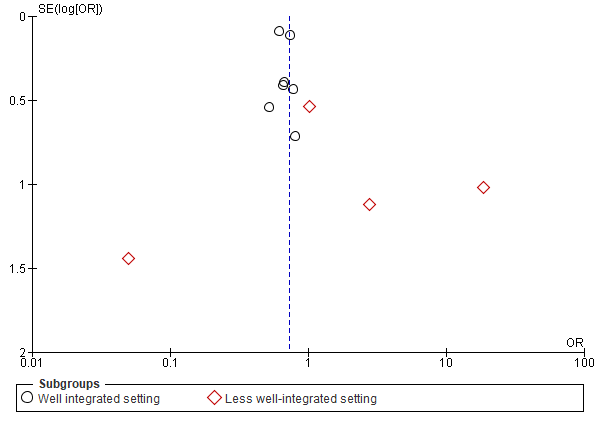  Apgar score <7 at 1/5 min(s) | (h)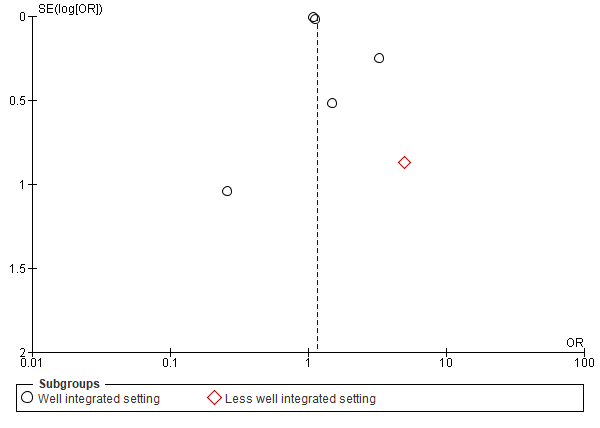  Post-term born |
